# Supplementary material
Source: publisher figshare collection journal article supplement (https://gsapubs.figshare.com/ndownloader/files/38882901)
Supplement: Supplementary file 1 [file 38882901]

## Sheet: Unknown Data
Table S7. Zircon trace element contents
NA-19-02
Analysis			Y	Y_2SE	Zr	Zr_2SE	Ce	Ce_2SE	Nd	Nd_2SE	Sm	Sm_2SE	Eu	Eu_2SE	Gd	Gd_2SE	Tb	Tb_2SE	Dy	Dy_2SE	Ho	Ho_2SE	Tm	Tm_2SE	Yb	Yb_2SE	Lu	Lu_2SE	Hf	Hf_2SE	[Yb/Gd]CN
2nd analytical session	Z_NA-19-02_2-1		412	40	480000	14000	13.5	2.3	7.7	2	4.18	0.79	1.15	0.36	10	1.4	2.71	0.3	34.1	3.5	13.6	1.2	18.1	1.4	198	12	45.9	2	11590	320	23.9347
	Z_NA-19-02_2-3		1265	81	489000	11000	51.1	2.7	36	2.3	13.64	0.85	15.18	0.91	31	1.8	8.66	0.55	98.6	6.7	38.2	2.9	49.8	3.7	500	36	104.9	6.9	12470	380	19.4972
	Z_NA-19-02_2-4		1150	110	434000	16000	18.1	4.4	14.6	4.3	9.4	2	3.07	0.88	37.4	4.1	10.7	1.2	121	12	41.1	4.8	32.1	4.8	262	43	49.9	7.8	11200	500	8.46823
	Z_NA-19-02_2-5		5070	250	444000	16000	90.6	5.1	67.8	5	34.7	2.3	62.4	6.9	124.7	8	40.2	2.5	489	26	176.3	9.5	162.9	8	1391	65	265	13	9380	270	13.4842
	Z_NA-19-02_2-6		5460	400	438000	11000	40.9	3.8	16	2.3	15.8	1.4	1.89	0.13	92.4	6.9	35	2.4	467	34	177	13	177	13	1560	110	282	19	11120	480	20.4087
	Z_NA-19-02_2-7		399	11	493000	15000	8.25	0.41	1.2	0.31	1.93	0.28	0.209	0.048	9.25	0.64	3.02	0.18	36.1	1.5	13.61	0.47	14.03	0.47	128.2	4.6	25.49	0.73	9560	440	16.7536
	Z_NA-19-02_2-8		456	41	461000	14000	44.8	2.4	20.3	1.2	5.68	0.42	6.68	0.37	11.8	1	3.04	0.25	35.7	3.2	14.4	1.3	17.9	1.6	189	17	41.9	3.3	10410	240	19.3617
	Z_NA-19-02_2-9		1859	97	455000	13000	6.41	0.39	1.86	0.33	3.45	0.45	1.02	0.13	24.2	1.7	9.98	0.67	142.8	8.2	60.7	3.7	65.9	3.5	629	31	127.1	6	7210	270	31.4194
	Z_NA-19-02_2-10		1210	110	372900	8800	40.4	3.2	24.1	2.5	12.4	1.5	19.9	3.1	29.7	3.1	7.23	0.79	86.9	9.8	37	3.6	56.8	4	614	38	145.8	7.4	10910	240	24.9905
	Z_NA-19-02_2-11		2230	130	406000	15000	19.8	2.3	11.3	2.1	8.2	1.4	0.91	0.18	24.5	2.2	8.63	0.7	127.5	8.6	66.5	4.2	108.9	6.5	1099	66	235	15	10240	480	54.2244
	Z_NA-19-02_2-12		1685	64	467000	14000	17.18	0.69	4.21	0.45	8.66	0.72	0.539	0.071	46.1	1.9	14.52	0.53	171.5	6	61.4	2.6	52.9	2.2	456	19	88	3.6	10470	380	11.9571
	Z_NA-19-02_2-13		3210	390	487000	16000	31.4	4.5	20.1	2.4	25.3	4.4	12.9	1.8	124	22	36.8	6.2	375	55	114	16	95	11	870	100	166	18	8610	320	8.48126
	Z_NA-19-02_2-14		2141	72	460000	15000	42.5	9.4	24.8	5.3	13	2.1	2.63	0.54	42.4	3.6	13.2	0.74	168.7	9.3	68.2	3.2	82.7	4.1	781	48	158.3	9.8	10950	370	22.2663
	Z_NA-19-02_2-15		1721	80	439000	17000	95	18	66	15	28.8	5.9	210	23	56.2	8.8	15.1	1.9	156	13	52.1	3	49.7	2	437	23	83.9	5.2	11600	540	9.39957
	Z_NA-19-02_2-16		1970	120	492000	19000	20.9	2	12.4	2	10.1	1.2	4.45	0.54	42.2	3.7	12.77	0.71	166	9.1	68.8	3.6	69.4	4.3	625	37	126.8	6.9	6360	260	17.9032
	Z_NA-19-02_2-18		1550	120	469000	15000	2.05	0.17	2.41	0.38	1.91	0.28	0.301	0.055	11.5	0.91	4.74	0.37	81.9	6	45.9	3.4	78.2	6	844	64	199	14	11530	360	88.7171
	Z_NA-19-02_2-19		2160	240	473000	15000	69.9	7	5.41	0.76	10.3	1.3	0.794	0.1	49.3	5.9	16.3	2.1	192	23	76.3	9.8	71.9	8.1	656	76	131	14	10710	380	16.085
	Z_NA-19-02_2-20		2210	390	457000	13000	169	32	174	32	75	13	74	16	112	17	23.9	3.6	234	39	72	14	62	12	560	120	100	20	13660	470	6.04412
	Z_NA-19-02_2-21		1127	34	460000	13000	15.59	0.57	5.41	0.83	6.29	0.72	1.3	0.23	25.7	1.5	8.37	0.34	102.4	3.6	38.9	1.1	37.2	1.2	320	10	61.2	1.6	11610	530	15.0515
	Z_NA-19-02_2-22		2625	70	459000	15000	89.9	2.5	23.9	2.7	17.2	1.4	3.25	0.35	52.4	2.2	16.73	0.64	218	5.8	85.8	2.5	99	2.7	945	30	188.1	5.6	11620	310	21.8003
	Z_NA-19-02_2-23		1862	73	467000	15000	0.89	0.14	1.62	0.33	9.02	0.84	0.719	0.09	69.1	4.2	25.3	1.5	240	12	60.3	2.6	35.6	1.3	272	10	46.4	2.2	11510	370	4.75832
	Z_NA-19-02_2-24		727	72	497000	21000	16	1.9	9.1	1	4.84	0.77	4.12	0.41	14.9	1.6	4.44	0.55	59.6	6.7	23.3	2.4	26.2	3	249	20	50.3	5.3	13690	580	20.2011
	Z_NA-19-02_2-25		1283	57	512000	17000	43.6	1.8	3.31	0.56	6.04	0.6	0.86	0.12	31.9	2	10.24	0.46	116.3	4.1	41.8	1.6	39.3	1.9	350	14	67.4	2.9	10790	420	13.263
	Z_NA-19-02_2-26		1130	250	421000	18000	71.3	8.3	58.1	5.7	27	2.4	17.6	2.8	46.4	5.6	10.1	1.5	93	19	34.4	7.7	44	10	431	96	90	18	12160	460	11.2285
	Z_NA-19-02_2-27		646	23	471000	18000	46.2	2.1	21.9	1.2	6.09	0.82	5	0.41	15.6	1.1	4.91	0.31	58.8	2.2	21.41	0.8	21.38	0.91	185.1	7.1	37.6	1.4	10140	340	14.3432
	Z_NA-19-02_2-28		1070	200	474000	19000	276	92	56	19	19	6.2	2.56	0.73	33.5	8.9	9	2	101	19	33.5	6.6	36	7.3	363	75	73	14	13850	490	13.0986
	Z_NA-19-02_2-29		1780	130	494000	17000	115.3	5.2	83.7	5.4	48.4	3.6	8.6	0.66	96.4	4.6	19.5	1	184	13	63.1	4.8	56.6	4.3	525	39	105.8	8.1	10700	390	6.58332
	Z_NA-19-02_2-30		742	26	470000	15000	11.08	0.29	1.35	0.34	2.31	0.28	0.144	0.034	14.74	0.98	5.2	0.27	65.7	2.8	25.11	0.91	24.34	0.87	219.2	6.7	42.8	1.4	11260	270	17.9765
	Z_NA-19-02_2-31		3570	110	425000	18000	51.9	3.9	33.5	3.8	18.3	2	2.21	0.34	51.5	4.3	14.53	0.75	197.9	7.6	97.8	2.9	171.4	7.2	1815	81	414	20	7660	450	42.6022
	Z_NA-19-02_2-32		427	29	463000	13000	34.6	3.7	33.2	4.1	12.6	1.2	6.3	1.6	19.8	1.8	3.98	0.33	37.7	3.4	12.46	0.9	15	1.5	176	19	49	5.9	12010	370	10.7451
	Z_NA-19-02_2-33		902	82	425000	15000	47	19	22.6	8.9	6.6	1.4	3.14	0.41	17.3	3	5.65	0.69	69.3	8.6	28.4	3.2	37.1	2.7	384	24	79.4	5.6	10950	550	26.8317
	Z_NA-19-02_2-34		903	87	485700	10000	74.5	6.3	38.7	3.1	14.8	1.3	6	0.47	27.9	2.9	7.2	0.74	80	8.1	29.4	3.1	31.1	3	294	26	59.1	5.3	12270	430	12.7381
	Z_NA-19-02_2-35		1150	130	486000	13000	8.38	0.99	2.43	0.62	3.36	0.57	1.36	0.24	17	2.3	6.29	0.74	86	11	37.1	4.2	45.2	5.2	464	50	102.8	9.6	11180	330	32.9938
	Z_NA-19-02_2-36		3430	480	461000	14000	54.9	9	12.1	2.5	12.3	1.7	1.31	0.29	65.8	9.1	23.3	2.9	286	36	102	14	95	14	850	130	151	23	12680	470	15.6155
	Z_NA-19-02_2-37		2830	570	440000	29000	63	10	67.3	9.7	32.1	4.8	5.3	0.56	64.6	9.8	16.5	3	195	38	85	18	120	24	1160	230	236	48	10210	660	21.7064
	Z_NA-19-02_2-38		1480	180	443000	23000	68.5	4.5	65.6	4.7	34.6	3.2	7.92	0.98	62	5	13.6	1.1	128	13	45.4	6	46.5	7.1	465	72	99	16	10290	480	9.06618
	Z_NA-19-02_2-39		5020	380	462000	13000	376	18	375	22	179.4	8.3	46.5	3.4	315	13	58	2.4	492	29	160	12	147	11	1310	100	261	18	10220	450	5.02717
	Z_NA-19-02_2-40		2330	140	479000	16000	38.2	4	31.4	3.3	16.5	1.6	3.53	0.34	41.5	2.9	13.38	0.75	169	10	73.8	4.8	95.4	8.4	926	86	192	18	10880	360	26.9728
	Z_NA-19-02_2-41		3750	530	484000	15000	49	13	44	12	31.7	6.4	4.74	0.83	101.2	9.1	28.9	2.9	336	45	122	18	117	19	1050	180	204	35	11870	360	12.5421
	Z_NA-19-02_2-42		2270	410	462000	20000	29.2	3	27.6	2.5	15.3	1.7	3.64	0.6	51.5	6.8	16.8	2.9	200	35	75	15	69	14	600	130	104	21	11550	670	14.0834
	Z_NA-19-02_2-43		2930	250	442000	13000	124.4	7.3	134.8	9.5	77.8	8	24.1	2.2	141	17	30.9	3.9	276	30	94.9	8.1	106.9	6.4	1083	58	239	12	14530	570	9.28479
	Z_NA-19-02_2-44		1612	56	522000	20000	33.3	1.5	11.3	1	10.8	1.3	0.85	0.14	37.2	2	12.27	0.59	148.1	6.2	56.1	2.5	58.2	2.6	539	31	103.5	4.5	12550	580	17.5149
	Z_NA-19-02_2-45		2440	370	472000	17000	129	22	132	21	64.2	9.4	24	4.3	112	13	25.3	2.7	250	31	80	13	65	12	560	110	105	21	13570	520	6.04412
	Z_NA-19-02_2-46		2780	420	478000	16000	9.8	1.4	2.81	0.56	7.1	1.6	1.3	0.3	53	11	19.8	3.4	251	41	98	16	89	13	770	110	143	19	10990	300	17.5622
	Z_NA-19-02_2-47		666	26	478000	16000	32.4	2.2	2.34	0.35	4.11	0.51	1.06	0.14	16.3	1.3	5.1	0.31	57.6	3	21.7	1.1	22.8	1	209.2	8.2	43	1.7	11440	360	15.5145
	Z_NA-19-02_2-48		807	32	451000	12000	17.69	0.48	0.99	0.35	2.32	0.33	0.62	0.1	15.5	1.3	5.44	0.34	71.2	3.7	28.1	1.4	28.9	1.1	262.5	8.9	54.7	2.2	10470	270	20.472
	Z_NA-19-02_2-49		3390	310	474000	15000	76	10	54.6	6	26.4	3.4	30.7	4.2	61.1	7.5	18.2	2.1	228	23	102.3	9	144	10	1389	91	281	17	10340	360	27.4805
	Z_NA-19-02_2-50		446	34	488000	13000	65.3	7.9	38.1	4.3	12.5	1.3	13.9	1.6	22.5	1.8	5.75	0.55	46.4	4.4	14	1.1	15.7	1.5	162	20	37.5	5.3	11870	440	8.70353
	Z_NA-19-02_2-51		1395	69	459000	13000	12	1.1	3.11	0.47	5.79	0.52	0.581	0.092	31.6	2	11.12	0.74	133.3	7.4	49	2.7	47.2	2.4	413	20	81.6	3.7	10810	370	15.7989
	Z_NA-19-02_2-52		3360	230	449000	17000	113	34	93	23	39.5	6.9	5.2	1.4	71.3	8.4	16.9	1.4	204	14	94.3	5.6	134.2	7.2	1233	63	243	12	8940	480	20.9043
	Z_NA-19-02_2-53		6250	510	494000	15000	38	4.6	24.3	3.8	24	3.7	5.75	0.82	122	14	40	4	526	52	195	17	184	16	1570	130	269	21	10820	400	15.5562
	Z_NA-19-02_2-54
	Z_NA-19-02_2-55		1145	56	483000	16000	339	42	120	12	36	2.8	3.52	0.32	41.3	3	10.57	0.6	104.5	4.5	36.3	1.7	39.2	2.4	377	26	77	5	12990	830	11.0345
	Z_NA-19-02_2-56		1015	34	498000	18000	39.8	9.5	27.7	5.8	10.5	1.7	3.8	1.3	19.6	1.5	5.67	0.32	76	3.4	32.1	1.2	42.5	1.7	424	17	86.2	4.4	11980	330	26.1501
	Z_NA-19-02_2-57		398	21	493000	17000	21.4	1.8	16.1	1.8	7.84	0.76	1.61	0.22	13.4	1.3	3.05	0.2	33.5	1.9	12.35	0.66	15.44	0.68	159.7	6.6	36.5	1.5	13090	640	14.4067
	Z_NA-19-02_2-58		809	33	500000	17000	6.5	1.4	1.47	0.9	1.08	0.35	0.18	0.058	6.9	0.72	3.61	0.24	54.2	2.8	24.9	1.1	37.3	2	390	18	81	3.8	11600	480	68.3248
	Z_NA-19-02_2-59		2440	240	452000	21000	171	22	142	24	51.7	7.3	27.9	4.1	75.5	9.7	15	1.3	158	13	66.2	6.2	114	14	1320	170	333	44	11280	600	21.1344
	Z_NA-19-02_2-60		1514	36	477000	17000	39.2	1.8	7.7	1.1	8.06	0.79	1.15	0.16	31.1	1.7	9.76	0.37	123.2	3.3	49.5	1.5	56	1.6	549	14	112.9	3.5	9490	380	21.339
	Z_NA-19-02_2-61		1610	60	499000	17000	37.3	2.3	34	3.3	25.9	1.8	37.4	3.6	78.2	3.8	18.87	0.81	188.6	6.4	57.3	2.3	42.5	1.7	341	13	60.3	2.4	10920	410	5.27121
	Z_NA-19-02_2-62		992	93	508000	23000	18.1	2.1	17.9	3	9.9	1.1	8.21	0.67	22	1.6	5.86	0.44	69.1	4.7	30.5	2.6	38.3	4.7	383	48	78.1	9.6	13260	500	21.0445
	Z_NA-19-02_2-63		5350	230	452000	17000	36.2	3.6	17.7	4.1	23.8	3.2	3.66	0.79	117.7	9.2	41.6	2.5	512	24	184.6	6.5	162.1	6.6	1351	63	219.8	8.9	9530	400	13.8753
	Z_NA-19-02_2-64		2320	230	455000	11000	104	21	84	13	66.1	8.3	22.1	2.6	120	13	31.8	3.4	278	28	70.7	7.1	47.8	4.6	406	35	64.9	5.1	9630	310	4.08985
	Z_NA-19-02_2-65		3770	170	458000	11000	6.4	1.1	10.4	1.7	16.4	2.3	3.43	0.88	71.4	7	25.9	1.6	327	15	124.9	5	133.6	6	1269	58	248	12	12890	380	21.4846
	Z_NA-19-02_2-67		2880	630	488000	15000	16.6	3.3	5.2	1.1	9.9	2.2	2.42	0.5	56	11	19.1	4	255	53	92	21	94	22	850	200	160	38	10660	500	18.3482
	Z_NA-19-02_2-68		1980	110	395000	20000	48.4	3.6	41.9	3.8	20.8	1.7	3.74	0.32	45	2.3	11.44	0.51	144.1	8.1	62.6	3.6	87.9	5.5	887	54	178	10	7170	480	23.8273
	Z_NA-19-02_2-69		2310	390	483000	16000	13.3	2.4	8.4	1.7	16.5	4	3.13	0.72	75	15	25.1	5	295	57	102	19	104	18	940	160	169	26	5770	370	15.1506
	Z_NA-19-02_2-70		2880	280	489000	15000	30.1	3	19.7	1.8	15.1	1.2	2.6	0.37	61.3	5.3	21.2	1.9	271	27	97.3	9.6	89.6	9.6	762	84	134	14	12110	350	15.0265
	Z_NA-19-02_2-71		4510	380	440000	12000	85.8	8.3	21.4	2.1	16.6	1.1	1.63	0.24	75.1	5.4	25	2	315	27	124	11	134	12	1220	100	221	18	16070	530	19.6373
	Z_NA-19-02_2-72		669	45	530000	22000	22.7	4.3	18.4	4.7	6	1	18.3	4.2	16.6	1.6	4.82	0.5	57.6	4.2	20.8	1.4	22.9	1.5	242	19	50.1	3	13900	770	17.6226
	Z_NA-19-02_2-73		1020	160	519000	17000	14.7	3.9	12.5	2.8	10.1	1.2	0.95	0.17	45.7	4.1	13.5	1.1	119	13	33.5	5.6	26.7	7	224	67	39	12	13300	860	5.92509
	Z_NA-19-02_2-74		1370	95	500000	14000	178	18	49	11	24.5	5.1	3.51	0.43	45.1	5.9	12.53	0.89	136.5	8.4	44.9	3.3	48.8	4.9	474	50	88.6	9.7	13980	670	12.7047
	Z_NA-19-02_2-75		2720	270	494000	15000	22.8	3.7	18.1	5.6	12.2	1.3	1.85	0.23	57.1	5	19.1	1.8	243	25	91.8	9.6	85.5	8.5	740	71	132	13	11660	400	15.666
	Z_NA-19-02_2-76		1405	53	497000	12000	120	12	119	13	52.1	5.2	28.9	2.3	84.1	4.7	17.62	0.69	159.2	5.1	47.5	2	45.4	2.6	454	27	95.9	5.5	10990	330	6.52563
	Z_NA-19-02_2-77		1300	130	486000	12000	15.7	3.2	17	3.4	10	1.9	3.9	1	37.6	4	12.76	0.81	137	11	41.3	4.2	30.5	3.9	257	36	48.7	7.1	12880	360	8.26244
	Z_NA-19-02_2-78		2300	200	474000	12000	108.2	7.7	57.2	4.1	29.7	2.1	23.4	2	77.6	5.8	18.5	1.5	201	18	74.3	7.3	74.7	6.6	719	59	140	10	11110	400	11.2003
	Z_NA-19-02_2-79		2710	110	465000	13000	56.4	8.7	41.5	6.9	19.6	2.3	5.57	0.63	46	2	13.52	0.44	179.9	7	80.8	3.4	120.3	5.4	1194	49	251.7	8.6	8230	280	31.3769
	Z_NA-19-02_2-80		1537	44	500000	13000	81.8	9.7	101	15	48.4	6.3	27.1	2.7	80.9	8.6	17.3	1.2	155.5	6.3	49.7	1.5	40.7	2.3	368	22	74.1	4.7	12530	360	5.49873
	Z_NA-19-02_2-81		950	53	481000	13000	36.1	2.7	3	0.78	3.13	0.39	3.4	1	15	1.2	5.31	0.37	70.8	4.4	29	1.7	38.5	2.3	401	19	93.6	4	11060	300	32.3159
	Z_NA-19-02_2-82		378	18	481000	14000	14.6	0.6	0.39	0.24	0.97	0.18	0.144	0.037	5.44	0.46	1.94	0.15	27.9	1.7	11.64	0.58	16.28	0.98	164	11	36.9	2.4	11780	400	36.4425
	Z_NA-19-02_2-83		2710	230	471000	14000	47	5.8	23.7	4.4	12.8	1.2	24.8	5.8	54.1	4	18	1.6	236	19	93.4	7.2	94	6.6	874	56	170.3	9.8	9760	330	19.5289
	Z_NA-19-02_2-84		5170	130	480000	16000	11.01	0.5	7.29	0.51	16.03	0.99	3.16	0.24	106.4	4.5	37.5	1.3	473	15	177.8	5.7	164.7	4.6	1394	39	257.5	7.2	8270	310	15.8374
	Z_NA-19-02_2-85		1570	110	525000	16000	77	16	9	2.4	6.55	1	2.47	0.5	27.8	2.6	10.07	0.83	134	11	48.5	3.2	52.3	3.4	476	30	92.1	5	11940	550	20.6978
	Z_NA-19-02_2-86		2400	240	495000	14000	125	18	7.25	0.58	12.5	1.7	1.39	0.2	62.6	7.9	19	2.3	224	26	81.1	8.7	74.8	6.3	697	53	138.3	7.3	11850	450	13.4593
	Z_NA-19-02_2-87		213	8.2	490000	13000	6.67	0.36	3.44	0.56	3.89	0.46	1.07	0.12	10.42	0.9	2.2	0.16	21.9	1.4	7.47	0.36	7.76	0.55	81.4	5.8	19.2	1.3	6220	190	9.44321
	Z_NA-19-02_2-88		3230	140	473000	12000	51.7	7.8	34	7	20.9	3.2	23.7	2.1	67	3.9	20.37	0.65	257.3	9.2	102.4	4.5	113	6.2	1055	69	212	13	10800	280	19.0345
	Z_NA-19-02_2-89		2720	190	480000	15000	92.1	6.5	69.7	6.1	21	1.9	161	12	55.2	4	15.4	1.1	199	15	84	6.3	99.5	5.9	1023	53	218	11	8820	310	22.4027
	Z_NA-19-02_2-90		2390	160	474000	15000	38.9	7.8	23.3	5.3	13.5	2.3	1.55	0.23	37.9	3.7	11.76	1	160	13	70.1	5.3	91.5	6.6	861	66	162	12	11310	470	27.4617
	Z_NA-19-02_2-91		897	43	472000	12000	20.15	0.82	1.45	0.38	3.27	0.4	0.158	0.048	17.9	1.2	6.19	0.35	81.2	4.7	30.6	1.5	32	1.5	297	15	61.2	2.5	12440	320	20.057
	Z_NA-19-02_2-92		6080	600	458000	14000	14.7	1.3	8.6	1.3	13.9	1.6	1.42	0.21	98	10	35.3	3.9	474	51	190	19	177	14	1512	93	292	16	10200	310	18.6504
	Z_NA-19-02_2-93		1290	140	503000	19000	170	13	204	24	93	11	60.7	7.2	128	13	21	2.3	157	17	41.2	4.5	38.1	2.7	410	20	99.9	6.5	12710	550	3.87201
	Z_NA-19-02_2-94		759	55	513000	20000	76	21	84	24	37.3	9.9	5.1	1.1	68	11	13.6	1.5	98.7	6.8	23.8	1.5	18.6	1.6	186	22	37.7	4.4	13990	690	3.30649
	Z_NA-19-02_2-95		720	110	448000	18000	2.46	0.82	0.63	0.55	1.75	0.33	0.36	0.11	16.3	1.8	6.27	0.46	68.4	7.4	21.2	3.4	15	3.2	117	27	20.8	5.1	11960	520	8.67683
	Z_NA-19-02_2-96		2860	220	489000	21000	116	28	108	32	56	16	8.4	2.2	125	22	31.2	3.5	290	17	87.2	5.1	73.3	7.9	628	81	116	13	12120	530	6.07313
	Z_NA-19-02_2-97		670	36	508000	17000	12.2	2.3	7.4	2.1	4.8	1.1	0.79	0.2	15.5	2.1	4.89	0.44	60.5	4.5	21.5	1.3	22.4	1.1	223	11	46.9	1.9	12380	380	17.3915
	Z_NA-19-02_2-98		4220	630	470000	15000	76.4	4.7	51.6	6.9	32	1.9	6.02	0.3	104	10	31.6	4.5	395	60	147	22	144	19	1290	150	233	21	8520	230	14.9941
	Z_NA-19-02_2-99		3040	380	443000	34000	40.4	3.4	31.4	3.7	15.6	1.9	10.8	1.2	52.9	7.1	18.9	2.4	254	34	99	13	107	14	990	120	194	24	11780	960	22.6226
	Z_NA-19-02_2-100		2063	89	494000	16000	68.1	7.1	14.7	3.4	11.9	1.1	2.65	0.29	47.8	2.8	15.18	0.94	188	10	69.4	3.5	66.9	2.9	605	23	121.1	4.1	8610	350	15.3
	Z_NA-19-02_2-101		792	58	419000	37000	8	1	4	2.4	3.8	1.1	1.44	0.45	13.5	2.3	4.89	0.56	62.5	6.8	23.2	2.5	21.5	2.4	184	20	38.5	3.6	10200	1100	16.4758
	Z_NA-19-02_2-102		5100	180	480000	14000	38.5	1.5	7.2	1.1	14.23	0.99	1.04	0.12	92.2	3.4	34.2	1.1	439	14	165.1	5.2	147.9	4.6	1222	36	208.1	6.2	8200	380	16.0215
	Z_NA-19-02_2-103		6450	180	478000	12000	12.94	0.47	7.05	0.6	18.1	1.2	3.26	0.24	129	5	46	1.5	586	19	214.3	5.4	191.8	5.7	1576	43	282.8	7.8	9700	300	14.7683
	Z_NA-19-02_2-104		5950	530	475000	10000	84.3	6.8	11.2	1	15.7	1.8	1.37	0.18	97	10	33.4	3.3	451	44	172	17	178	17	1620	150	290	27	8940	270	20.1886
	Z_NA-19-02_2-105		1984	86	456000	13000	42.7	4.3	41.1	3.4	19.2	1.3	2.45	0.26	33.3	2.2	8.25	0.4	116.9	5	64.4	2.9	108.9	4.3	1029	40	212.4	8.6	12480	490	37.3537
	Z_NA-19-02_2-107		6950	540	477000	14000	20.6	2.1	14.5	1.4	30.5	3.1	5.53	0.56	177	16	57.7	5.1	690	60	242	20	202	16	1660	130	281	20	7280	200	11.337
	Z_NA-19-02_2-108		1048	55	498000	11000	43.8	4.6	27.1	5.7	13.5	1.9	20.7	8.3	35.8	1.9	9.21	0.45	103.2	4.9	34.9	1.8	30.5	2	271	18	53.2	3.6	11110	320	9.15059
	Z_NA-19-02_2-109		1780	260	448000	15000	37.6	4	26.4	2.7	15.6	1.9	3.79	0.43	40.8	5.7	11.6	1.9	139	24	56.4	9	73.8	7.8	781	61	172.8	8.7	10500	420	23.1395
	Z_NA-19-02_2-110		1949	68	476000	18000	6.55	0.35	1.8	0.36	4.32	0.39	1.01	0.12	31	1.7	11.62	0.37	154.2	4.8	63.2	2.3	65.8	2	593	17	116.6	3.6	9350	330	23.1236
	Z_NA-19-02_2-111		1730	140	513000	17000	32.9	3	36.4	4.7	23.3	3.1	2.89	0.42	46.9	4.3	13.8	1.1	156	13	57	4.5	56.2	3.8	509	35	94.2	6.6	13440	490	13.1192
	Z_NA-19-02_2-112		2190	67	452000	11000	17.6	1.1	4.91	0.62	9.41	0.67	0.95	0.17	51.5	2.8	16.97	0.93	206.5	8.6	76.2	3.3	66.9	2.6	576	21	110.9	4.3	10000	310	13.52
	Z_NA-19-02_2-113		6080	290	477000	15000	137.9	8	14.4	1.2	20.5	1.7	0.697	0.091	104.6	5.2	33.6	1.8	401	19	143.2	7	156.4	6.9	1472	60	285	11	13980	480	17.0114
	Z_NA-19-02_2-114		2237	93	488000	15000	15.4	1.1	9.7	1.8	9.3	1.1	3.17	0.32	44.8	1.5	16.06	0.59	207.4	8	78.3	3.3	80.6	3.4	734	30	140.2	5.4	6760	220	19.8053
	Z_NA-19-02_2-115		1340	160	454000	19000	96	20	96	21	45	10	8	1.8	57	11	10.7	1.6	101.7	9.1	38.8	4.4	54.8	10	530	100	105	20	11180	500	11.2399
	Z_NA-19-02_2-116		1574	51	498000	17000	12.65	0.48	6.17	0.46	11	0.7	0.368	0.062	49	2.5	14.36	0.61	161.7	5.4	55.7	2.2	47.2	1.9	395	15	74.7	2.8	10070	350	9.7446
	Z_NA-19-02_2-117		2450	470	439000	22000	15.8	2.2	9.2	1.3	6.9	1.3	0.9	0.15	25.9	5.9	9.6	2.3	145	32	72	14	113	19	1190	180	259	36	6890	300	55.5405
	Z_NA-19-02_2-118		3940	280	452000	13000	29.6	1.4	19.4	2	13.6	1.5	2.36	0.4	47.3	4.8	15.5	1.3	229	17	107.5	6.9	168	10	1720	110	361	23	10690	380	43.9572
	Z_NA-19-02_2-119
	Z_NA-19-02_2-120

## Sheet: Standard Data
Analysis	Approx_U_ppm	Approx_Pb_ppm	Approx_Th_ppm	U_Th	U238_Pb206	U238_Pb206_2SE%	Pb207_Pb206	Pb207_Pb206_2SE%	Pb207_U235	Pb207_U235_2SE%	Pb206_U238	Pb206_U238_2SE%	rho	PbPb_date	PbPb_date_2SE	UPb7_date	UPb7_date_2SE	UPb6_date	UPb6_date_2SE	cor7UPb6_date	cor7UPb6_date_2SE	Y	Y_2SE	Zr	Zr_2SE	Ce	Ce_2SE	Nd	Nd_2SE	Sm	Sm_2SE	Eu	Eu_2SE	Gd	Gd_2SE	Tb	Tb_2SE	Dy	Dy_2SE	Ho	Ho_2SE	Tm	Tm_2SE	Yb	Yb_2SE	Lu	Lu_2SE	Hf	Hf_2SE
Z_91500-1	80.3	15	30.3	2.659	5.588	1.8	0.0755	5.3	1.86	5.6	0.179	1.8	0.32	1080	110	1068	37	1061	17	1060	18	138.7	4.4	455000	15000	2.39	0.12	-0.27	0.21	0.37	0.1	0.215	0.05	1.98	0.25	0.805	0.069	11.33	0.64	4.71	0.21	6.09	0.27	64	2.6	12.99	0.48	5430	160
Z_91500-2	79.3	14.8	29.6	2.676	5.554	1.7	0.0743	6.3	1.84	6.5	0.18	1.7	0.27	1050	130	1061	43	1067	17	1068	18	139.9	4	459000	16000	2.33	0.14	0.16	0.25	0.46	0.16	0.219	0.046	2.3	0.28	0.814	0.067	11.5	0.6	4.79	0.25	6.41	0.27	66.1	2.7	13.25	0.47	5520	200
Z_91500-3	80.3	15.5	30	2.665	5.67	1.9	0.0739	6.7	1.8	7	0.1763	1.9	0.27	1040	140	1044	46	1047	19	1047	19	140.7	4.5	462000	13000	2.47	0.14	0.63	0.2	0.48	0.14	0.239	0.041	2.22	0.31	0.749	0.066	11.08	0.6	4.64	0.17	6.3	0.22	63.6	2	13.14	0.5	5610	190
Z_91500-4	80.5	15	30.2	2.67	5.58	1.8	0.0749	5.8	1.85	6.1	0.1792	1.8	0.30	1070	120	1064	40	1063	18	1063	18	129.6	3.5	474000	15000	2.41	0.15	0.32	0.22	0.43	0.11	0.195	0.039	2.03	0.25	0.712	0.057	9.9	0.66	4.25	0.21	6.24	0.31	63.3	2.4	12.94	0.42	5690	210
Z_91500-5	79.9	14.9	30.3	2.657	5.583	1.5	0.0753	6.1	1.86	6.3	0.1791	1.5	0.24	1080	120	1067	42	1062	15	1061	16	122	3.9	481000	15000	2.23	0.13	0.79	0.22	0.294	0.096	0.188	0.044	1.84	0.21	0.656	0.056	9.34	0.58	4.12	0.2	5.64	0.26	60.7	2.3	12.61	0.47	5710	170
Z_91500-6	77.3	14.5	28.7	2.692	5.49	2	0.076	6.3	1.91	6.6	0.182	2	0.30	1100	130	1084	44	1078	20	1077	20	115.7	2.9	469000	15000	2.21	0.14	0.46	0.31	0.28	0.096	0.156	0.043	1.93	0.27	0.661	0.065	8.78	0.48	3.74	0.16	5.62	0.25	56	2.4	12.1	0.44	5520	150
Z_91500-7	83.8	16.1	32.1	2.641	5.58	1.8	0.0733	6.7	1.81	6.9	0.1791	1.8	0.27	1020	140	1049	45	1062	18	1064	19	138.3	3.8	470000	15000	2.41	0.16	0.22	0.23	0.47	0.11	0.178	0.035	1.78	0.3	0.808	0.075	11.26	0.55	4.6	0.22	6.37	0.25	65.7	2.4	13.39	0.46	5500	170
Z_91500-8	79.6	14.8	29.6	2.68	5.586	1.7	0.0736	6.2	1.82	6.4	0.179	1.7	0.27	1030	120	1051	42	1062	17	1063	18	133.7	3.8	484000	16000	2.3	0.15	0.47	0.27	0.44	0.12	0.214	0.053	1.71	0.24	0.712	0.063	10.19	0.53	4.36	0.17	5.9	0.25	63.1	2.1	13.1	0.46	5700	170
Z_91500-9	80.8	14.8	30.2	2.666	5.6	1.8	0.0771	5.8	1.9	6	0.1787	1.8	0.30	1120	120	1081	40	1060	18	1057	19	121.9	3	483000	15000	2.21	0.14	-0.15	0.21	0.39	0.12	0.156	0.042	1.9	0.28	0.679	0.069	9.62	0.55	4.01	0.19	5.81	0.24	59.1	2.2	12.39	0.46	5740	210
Z_91500-10	77.9	15.1	29.4	2.665	5.547	1.7	0.0749	6.4	1.86	6.6	0.1803	1.7	0.26	1060	130	1067	44	1068	17	1069	18	116.8	3.3	479000	13000	2.01	0.14	0.61	0.32	0.29	0.11	0.158	0.042	1.93	0.33	0.647	0.063	9.36	0.51	3.74	0.17	5.36	0.24	58.1	1.8	11.97	0.43	5660	170
Z_91500-11	78.8	14.9	29.7	2.674	5.51	1.8	0.073	6.6	1.82	6.9	0.1813	1.8	0.27	1010	140	1054	45	1074	18	1077	19	117.7	3.7	477000	17000	2.21	0.16	-0.14	0.24	0.27	0.1	0.197	0.044	1.59	0.22	0.671	0.062	8.96	0.53	3.87	0.2	5.58	0.23	56.9	2.5	12.34	0.55	5610	200
Z_91500-12	83.2	15	31.1	2.644	5.67	2.1	0.0766	7.1	1.86	7.4	0.1763	2.1	0.28	1110	140	1067	49	1047	20	1044	21	124.7	3.6	473000	14000	2.35	0.14	0.08	0.24	0.35	0.12	0.236	0.048	1.55	0.18	0.71	0.069	9.72	0.52	4.08	0.18	5.71	0.26	60.3	2.3	12.3	0.41	5500	150
Z_91500-13	82.8	15.3	30.2	2.688	5.62	2.1	0.074	7.7	1.81	8	0.178	2.1	0.27	1040	160	1051	52	1056	21	1057	22	121	3	505000	14000	2.36	0.15	0.13	0.25	0.25	0.1	0.161	0.039	1.84	0.3	0.597	0.067	9.44	0.61	4.09	0.23	5.69	0.27	58.7	2.2	12.33	0.39	5810	160
Z_91500-14	79	14.8	29.7	2.722	5.6	2.3	0.0754	7.5	1.86	7.9	0.1787	2.3	0.29	1080	150	1066	52	1060	23	1059	24	120.5	2.9	490000	11000	2.44	0.2	0.23	0.31	0.35	0.13	0.186	0.053	1.71	0.33	0.67	0.078	9.43	0.59	3.84	0.23	5.87	0.28	58.2	2.3	11.88	0.36	5760	160
Z_91500-15	77.1	14.8	29.6	2.625	5.56	2.1	0.0747	7.2	1.85	7.5	0.1799	2.1	0.28	1060	150	1064	49	1067	21	1067	22	123.1	4	503000	14000	2.35	0.17	-0.25	0.32	0.35	0.13	0.193	0.06	1.51	0.3	0.723	0.077	9.79	0.65	4.02	0.26	5.7	0.25	59.1	2.2	12.93	0.52	5990	140
Z_Plesovice-1	633.7	10	61.3	10.362	18.18	1.6	0.0576	5.1	0.437	5.4	0.05499	1.6	0.29	520	110	368	17	345.1	5.3	343.3	5.4	445	18	436000	13000	1.98	0.13	1.31	0.33	2.72	0.45	0.91	0.11	12.41	0.83	4.39	0.27	48	2.2	13.21	0.58	8.12	0.44	56	2.9	7.66	0.45	11300	360
Z_Plesovice-2	576.2	9.2	55.6	10.36	18.44	1.4	0.0541	6	0.404	6.1	0.05423	1.4	0.22	370	130	345	18	340.5	4.5	340.1	4.7	437	21	451000	14000	2	0.17	1.54	0.41	2.85	0.39	0.87	0.13	11.66	0.9	4.21	0.3	47.6	2	13.3	0.72	7.81	0.39	52.7	2.8	7.03	0.34	11440	330
Z_Plesovice-4	581.5	9.4	56.2	10.379	18.43	1.6	0.0536	5.8	0.401	6	0.05427	1.6	0.27	350	130	342	18	340.7	5.4	340.5	5.6	402	19	466000	12000	1.88	0.12	1.95	0.37	2.56	0.42	0.74	0.11	11	1	4.05	0.26	43.8	2.2	12.51	0.62	7.21	0.47	50.5	3.2	6.85	0.36	11810	310
Z_Plesovice-5	547.6	9	54.4	10.077	18.34	1.7	0.0522	5.4	0.392	5.6	0.05453	1.7	0.29	290	120	336	16	342.3	5.5	342.7	5.6	405	19	482000	12000	1.93	0.17	1.98	0.46	2.57	0.41	0.71	0.095	11.1	1.1	3.91	0.27	43.7	2.6	12.63	0.68	7.2	0.45	49.5	3	6.33	0.29	12300	320
Z_Plesovice-6	515.1	8.3	50.4	10.308	18.03	1.6	0.0503	5.1	0.385	5.3	0.05548	1.6	0.31	210	120	330	15	348.1	5.5	349.4	5.6	357	12	456000	14000	1.76	0.25	0.98	0.67	2.5	0.51	0.73	0.21	9.4	1.5	3.5	0.33	37.6	1.7	11.31	0.63	6.41	0.43	45.2	2.1	6.49	0.53	12110	400
Z_Plesovice-7	638.4	9	61	10.58	18.61	1.9	0.0553	5.9	0.41	6.2	0.0537	1.9	0.30	430	130	349	18	337.4	6.1	336.6	6.3	380	17	489000	20000	1.79	0.15	1.47	0.42	2.33	0.36	0.6	0.12	9.45	0.86	3.87	0.24	41.2	2.4	11.45	0.64	6.89	0.43	46.4	2.8	6.26	0.32	12230	390
Z_Plesovice-8	491.3	7.5	46.7	10.441	18.51	1.5	0.0554	6.2	0.412	6.4	0.05401	1.5	0.24	430	140	351	19	339.1	5.1	338.2	5.3	347	8.7	467000	15000	1.83	0.13	0.91	0.31	2.09	0.32	0.569	0.096	8.74	0.64	3.34	0.2	36.6	1.8	10.68	0.45	6.22	0.3	43.8	1.7	5.91	0.26	11930	270
Z_Plesovice-9	590.6	9.3	56.7	10.343	18.55	1.6	0.0509	5.2	0.378	5.4	0.0539	1.6	0.30	230	120	326	15	338.4	5.4	339.4	5.5	349	9.7	454000	13000	1.64	0.12	1.4	0.35	2.09	0.3	0.576	0.077	8.78	0.6	3.43	0.18	38	1.7	10.38	0.39	6.36	0.29	45	1.9	5.97	0.24	11680	320
Z_Plesovice-10	586.4	9.8	56.9	10.286	18.49	1.4	0.0521	5.3	0.388	5.5	0.05409	1.4	0.27	290	120	333	15	339.6	4.8	340.1	4.9	348.6	7.6	453000	11000	1.55	0.11	1.44	0.24	2.3	0.36	0.583	0.086	9.1	0.6	3.43	0.18	36.5	1.6	10.38	0.38	6.24	0.26	43	1.8	5.89	0.24	11700	260
Z_Plesovice-11	626.4	9.8	59.1	10.438	18.43	1.9	0.0523	5.3	0.391	5.6	0.0543	1.9	0.34	300	120	335	16	340.6	6.4	341	6.5	360	11	470000	13000	1.62	0.13	1.24	0.29	2.11	0.33	0.673	0.089	9.41	0.69	3.46	0.17	38.2	1.7	10.58	0.36	6.46	0.26	45.3	1.7	6.16	0.31	11760	340
Z_Plesovice-12	579.4	9.4	57.2	10.017	18.51	1.8	0.0531	6.1	0.395	6.3	0.05403	1.8	0.29	330	140	338	18	339.2	6	339.3	6.1	367	12	454000	15000	1.7	0.15	1.04	0.4	2.62	0.37	0.571	0.079	9.51	0.77	3.61	0.25	40	1.8	11.16	0.47	6.83	0.34	47.4	2.2	6.5	0.4	11650	370
Z_Plesovice-13	646.4	10.3	64.1	9.743	18.6	1.6	0.0522	5.2	0.387	5.5	0.05377	1.6	0.30	290	120	332	16	337.6	5.4	338	5.5	382	16	472000	13000	1.57	0.11	1.05	0.3	2.27	0.3	0.688	0.085	10.17	0.81	3.78	0.19	41.5	1.9	11.64	0.53	6.88	0.36	49.2	2	6.54	0.35	11860	360
Z_Plesovice-14	931.8	13.8	95.6	9.851	18.54	1.5	0.0542	5.6	0.403	5.9	0.05392	1.5	0.26	380	130	344	17	338.6	5.1	338.2	5.2	452	17	487000	15000	2.09	0.16	2.11	0.46	3.08	0.35	0.82	0.13	12.55	0.88	4.6	0.27	49.9	2.3	13.69	0.66	8.2	0.46	55.7	3.1	7.51	0.42	12170	370
Z_Plesovice-15	832.1	12.4	83.7	10.06	18.43	2.6	0.0568	5.9	0.425	6.5	0.0543	2.6	0.41	480	130	360	20	340.7	8.8	339.2	8.9	424	19	470000	15000	1.92	0.16	1.88	0.37	2.81	0.34	0.74	0.1	11.1	1.2	4.35	0.28	46.7	2.8	12.6	0.72	7.56	0.46	53.5	3	7.02	0.4	11670	400
																				340	2
																			MSWD	0.44	n = 13/14
NIST610-1	314.4	1516.8	333.6	0.947	4.43	2.6	0.916	3.3	28.5	4.2	0.2255	2.6	0.61			3435	41	1311	31			458	11	445	11	451	11	426	11	457	14	441	11	443	13	433.9	8.9	431	11	447	10	433	12	446	11	437	11	431	11
NIST610-2	319.4	1547	347.1	0.912	4.489	2.2	0.946	3.3	29.1	4	0.2228	2.2	0.55			3455	39	1297	26			463	13	456	14	450	12	430	12	452	12	450	11	449	12	439	9.7	440	11	450	10	435	12	452	12	439	10	441	11
NIST610-3	346.3	1841.7	390.5	0.891	4.47	2.6	0.902	3.4	27.8	4.3	0.2238	2.6	0.62			3412	42	1302	31			468	11	445.9	9.7	460	11	438	11	452	11	449.4	10	457	11	444	10	439	11	452.1	8.9	442	11	456	13	444	10	435	12
NIST610-4	348.4	1686.8	384.8	0.915	4.398	2.2	0.925	3.3	29	3.9	0.2274	2.2	0.56			3453	39	1321	26			456	11	449	12	451	12	428	13	448	14	451	13	443	12	435	12	444	12	444	11	432	11	450	13	437	12	432	12
NIST610-5	361.2	1907.5	410.7	0.876	4.465	2.2	0.866	3.3	26.7	4	0.224	2.2	0.55			3373	39	1303	26			463	12	446	12	452	11	426	11	452	11	447	13	454	14	434.1	8.4	431	13	455	12	432	12	448	12	433	11	439	13
NIST610-6	369.5	1887.4	420.5	0.883	4.45	2.4	0.916	3.3	28.4	4	0.2248	2.4	0.59			3432	40	1307	28			469	12	454	12	456	11	434	12	455	14	446	12	447	14	435	11	438	12	446	12	438	11	452	13	440	12	429	12
NIST610-7	391.1	1914	443.5	0.867	4.5	2.5	0.924	3.4	28.3	4.2	0.2224	2.5	0.60			3431	42	1295	30			462	11	445	12	457	11	428	12	455	12	446	10	450	14	439	10	438	11	449	12	428	11	449	12	440	12	435	12
NIST610-8	444	2401.5	528.4	0.875	4.34	2.5	0.913	3.4	29	4.2	0.2302	2.5	0.59			3452	41	1335	30			456	12	448	11	448.8	9.5	429	14	452	13	447	12	447	12	438	12	434	12	448	13	441	11	450	13	440	11	438	14
NIST612-1	24.7	130.3	26.7	0.938	4	2.8	0.899	4.7	31	5.5	0.2503	2.8	0.51			3519	54	1440	36			38.1	1	40	1.3	38.31	0.97	33.9	1.6	38.2	1.9	35.4	1	39.5	1.7	37.21	0.99	35.3	1.4	38.5	1.2	37.4	1	38	1.6	37.3	1.1	37.1	1.6
NIST612-2	25.2	142.4	28.7	0.874	4.08	3.3	0.945	4.3	31.9	5.4	0.2449	3.3	0.61			3546	53	1412	42			38.81	0.93	35.3	1.8	38.6	1.2	37.1	1.8	38.2	1.7	35.75	0.99	39.2	1.6	37.4	1	35.4	1.6	37.8	1.1	37.3	1	39	1.6	37.4	1.1	37.4	1.4
NIST612-3	26.5	149.4	30.3	0.879	4.08	3.6	0.931	4.6	31.4	5.8	0.245	3.6	0.62			3533	57	1413	46			38.9	1	39.1	1.1	37.8	1	35.6	1.7	38.7	2	35.9	1.2	37	1.7	37.7	1	35.5	1.2	38.1	1.1	37.69	0.89	38.3	1.8	37.4	1.1	37.2	1.5
NIST612-4	26.4	149.8	30.2	0.868	4	3	0.902	4.2	31.1	5.1	0.2498	3	0.58			3521	50	1437	38			38.56	0.87	38	1	38.78	0.97	36.5	1.6	37.1	1.7	36.4	1.1	38.5	1.6	38.3	1.1	35.4	1.5	39.52	0.93	37.6	1.1	38.8	1.5	38.17	0.86	38.8	1.4
NIST612-5	27.9	158.3	32	0.882	3.94	3.1	0.858	4.1	30	5.2	0.2541	3.1	0.60			3488	51	1459	41			39.1	1	38.2	1.4	38.66	0.95	37.1	1.7	38.8	1.7	35.4	1.3	37.8	1.2	38.2	1.1	36.5	1.5	38.2	1.2	37.5	1.1	37.2	1.7	37.7	1.1	37.4	1.4
NIST612-6	28.4	154.6	32.6	0.865	4.05	3.2	0.917	4.5	31.2	5.5	0.2469	3.2	0.58			3525	54	1423	41			39.3	1.1	31	1.3	38.16	0.81	35	1.5	37.5	1.6	35.5	1.2	37.3	2	36.73	0.89	35.8	1.2	38.3	1.1	36.44	0.83	38.3	1.8	36.9	1	37.1	1.3
NIST612-7	34	198.3	40.1	0.876	3.93	2.7	0.906	4.4	31.7	5.2	0.2543	2.7	0.53			3542	51	1461	36			39	1.1	14	11	38.6	1.1	36.4	1.8	37.1	1.8	35.4	1.1	38.2	1.9	36.75	0.94	36.5	1.8	37.8	1.1	37.4	1	38.3	1.3	37.1	1	37.1	1.5
[truncated: 1 more columns]
